# Supplementary figures and images for: The predictive value of normal EEGs in dementia due to Alzheimer’s disease
Source: PubMed Central journal article supplement — Ann Clin Transl Neurol. 2021 Apr 9;8(5):1038–48. doi: 10.1002/acn3.51339 (PMC8108419; doi:10.1002/acn3.51339), 2021-04-09

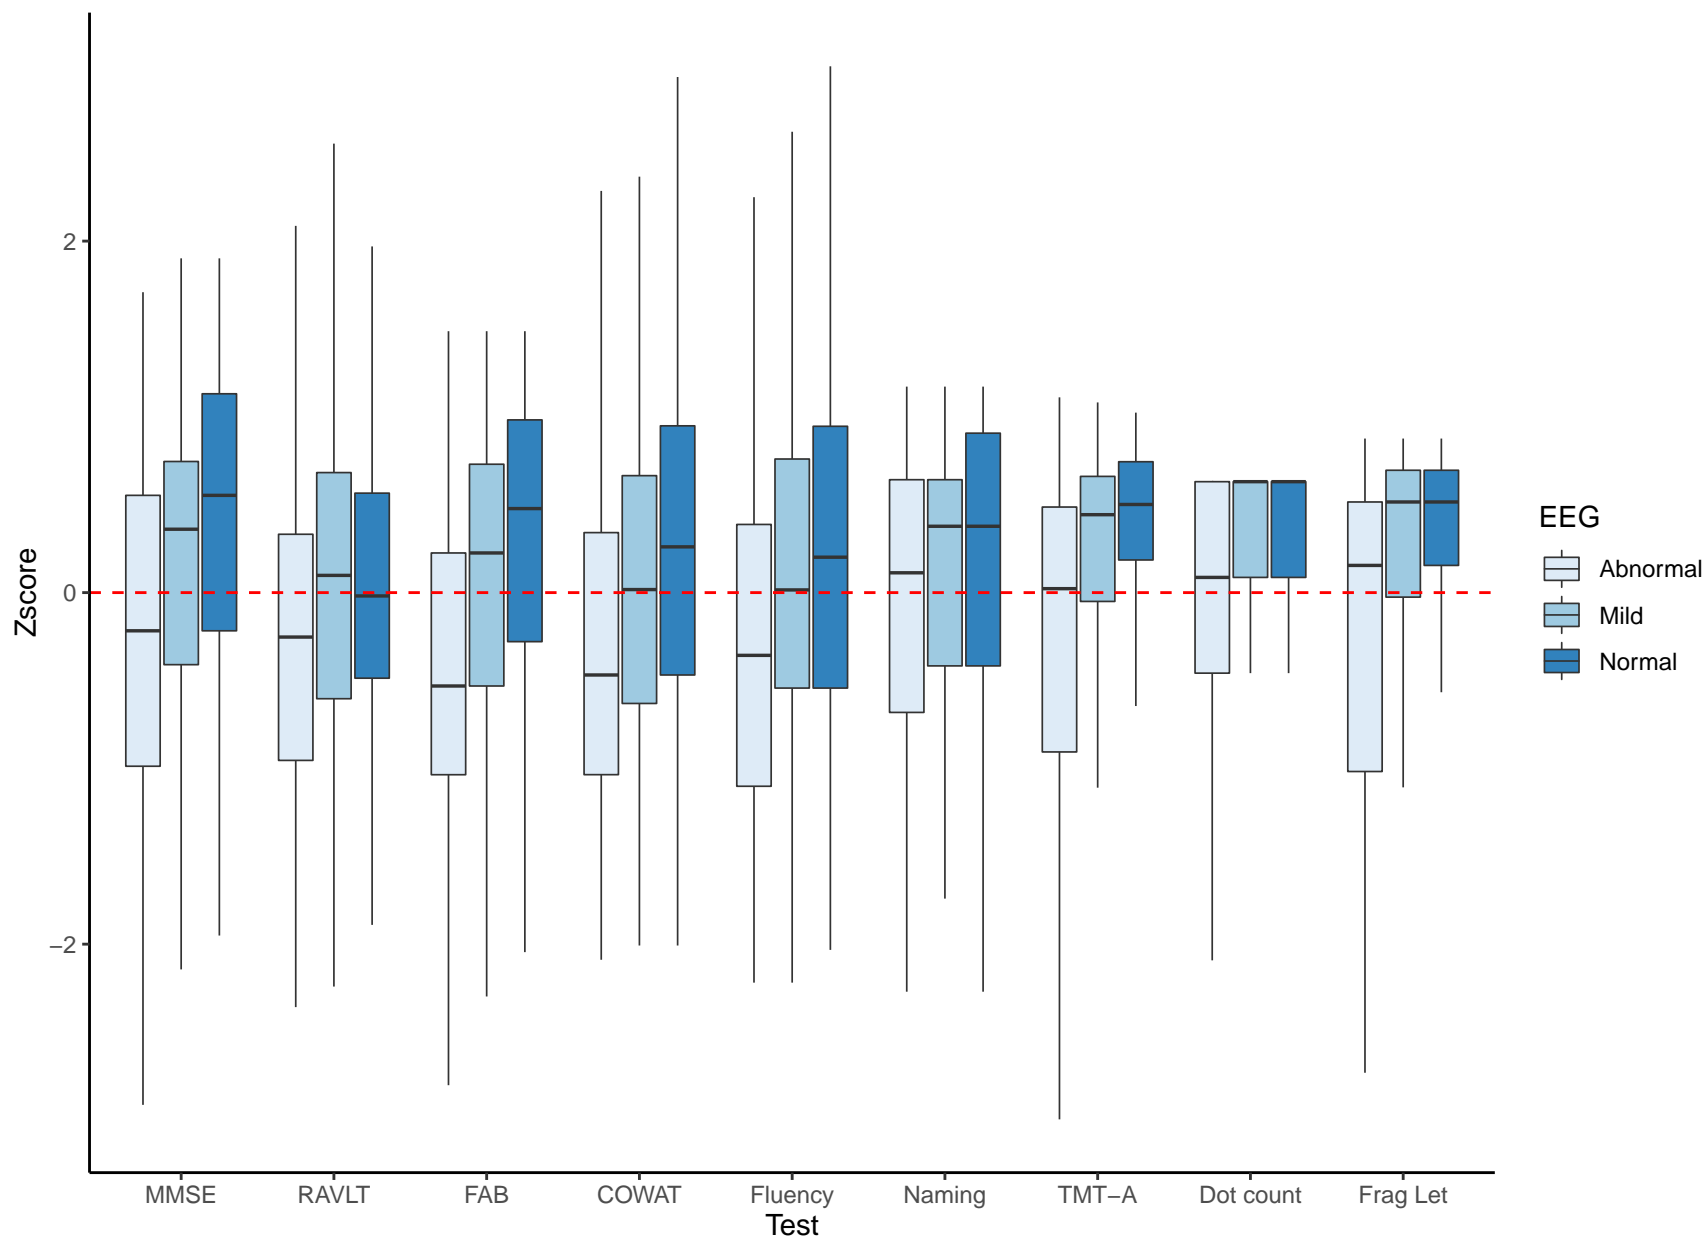

Supplement: ACN3-8-1038-s001.pdf [file ACN3-8-1038-s001.pdf]
